# Supplementary material for: Orbital Exenteration for Craniofacial Lesions: A Systematic Review and Meta-Analysis of Patient Characteristics and Survival Outcomes
Source: MDPI journal article supplement (doi:10.3390/cancers15174285), 2023-08-27
Supplement: s1 [file s1]

---

# Supplementary Materials: Orbital Exenteration for Craniofacial Lesions: A Systematic Review and Meta-Analysis of Patient Characteristics and Survival Outcomes

Jumanah Qedair, Ali S. Haider, Kishore Balasubramanian, Paolo Palmisciano, Taimur Hassan, Ataollah Shahbandi, Mohammadmahdi Sabahi, Abdurrahman F. Kharbat, Hussam Abou-Al-Shaar, Kenny Yu, Aaron A. Cohen-Gadol, Tarek Y. El Ahmadieh and Othman Bin-Alamer

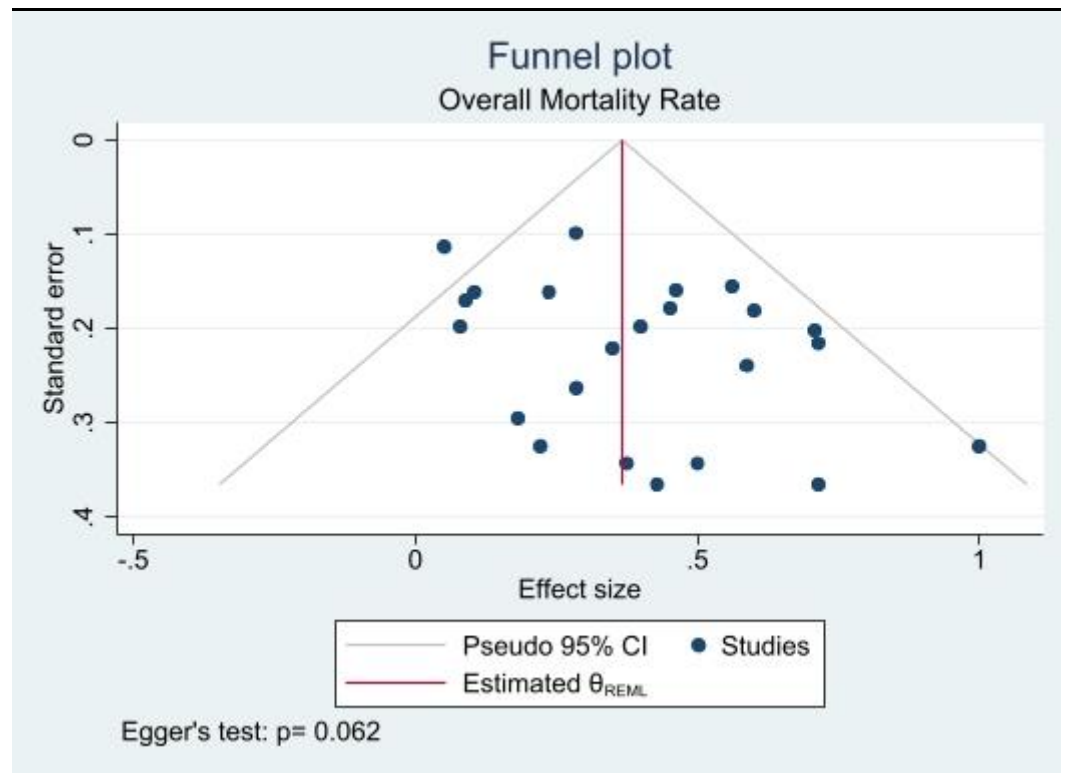

(A)

---

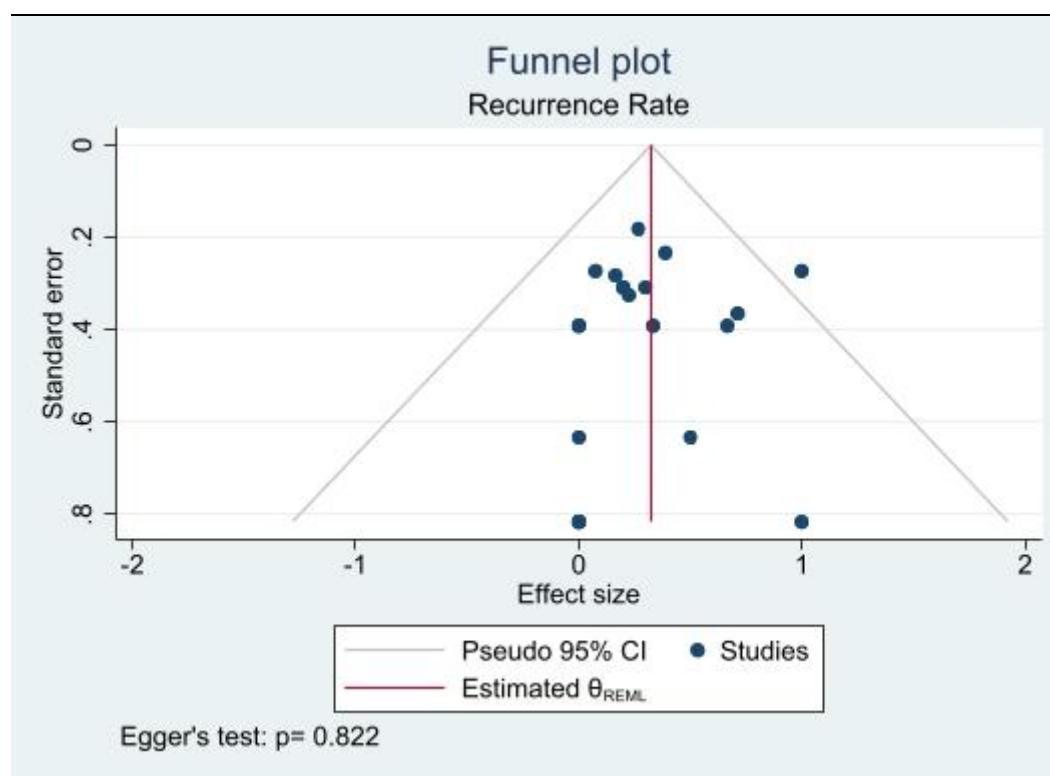

(B)

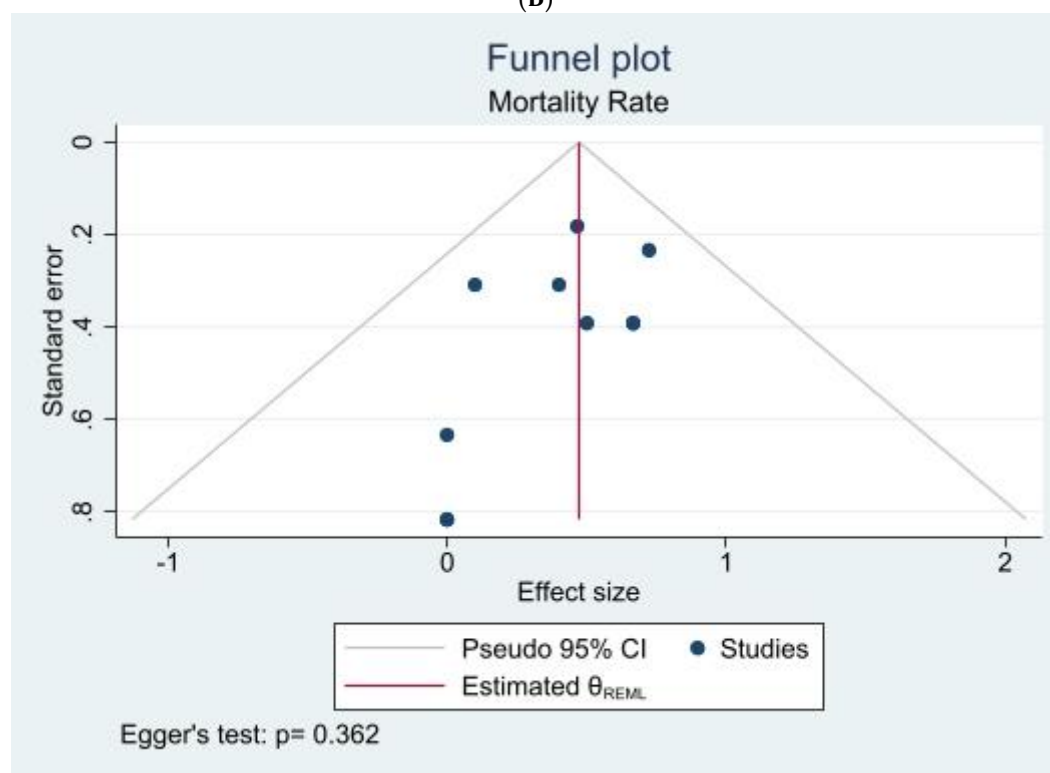

(C)

**Figure S1.** Funnel plot of (A) overall mortality rate of the cohort, (B) tumor recurrence rate based on the type of OE, and (C) mortality rate based on the type of OE. OE, orbital exenteration.

**Table S1.** Risk of bias assessments for included studies.

| <b>JBI Checklist for Case Series – Criteria</b>                                                                  |
|------------------------------------------------------------------------------------------------------------------|
| 1. Were there clear criteria for inclusion in the case series?                                                   |
| 2. Was the condition measured in a standard, reliable way for all participants included in the case series?      |
| 3. Were valid methods used for identification of the condition for all participants included in the case series? |
| 4. Did the case series have consecutive inclusion of participants?                                               |
| 5. Did the case series have complete inclusion of participants?                                                  |
| 6. Was there clear reporting of the demographics of the participants in the study?                               |
| 7. Was there clear reporting of clinical information of the participants?                                        |
| 8. Were the outcomes or follow up results of cases clearly reported?                                             |
| 9. Was there clear reporting of the presenting site(s)/clinic(s) demographic information?                        |
| 10. Was statistical analysis appropriate?                                                                        |
| <b>Responses Options:</b> Yes, No, Unclear, Not Applicable (NA)                                                  |
| <b>Quality Rating:</b> Poor 0 – 3; Fair 4 – 7; Good 8 – 10                                                       |

| <b>Study</b>                 | <b>1</b> | <b>2</b> | <b>3</b> | <b>4</b> | <b>5</b> | <b>6</b> | <b>7</b> | <b>8</b> | <b>9</b> | <b>10</b> | <b>Appraisal</b> |
|------------------------------|----------|----------|----------|----------|----------|----------|----------|----------|----------|-----------|------------------|
| Martel et al., 2020 [6]      | Yes       | 10- Good         |
| Nemet et al., 2007 [8]       | Yes       | 10- Good         |
| Hoffman et al., 2016 [9]     | Yes      | Yes      | Yes      | Yes      | Yes      | Yes      | No       | Yes      | Yes      | Yes       | 9- Good          |
| Nassab et al., 2007 [23]     | Yes      | Yes      | Yes      | Yes      | Yes      | Yes      | No       | No       | Yes      | Yes       | 8- Good          |
| Simon et al., 2005 [3]       | Yes       | 10- Good         |
| Tassone et al., 2017 [11]    | Yes      | Yes      | Yes      | Yes      | Yes      | Yes      | No       | Yes      | Yes      | Yes       | 9- Good          |
| Taylor et al., 2006 [12]     | Yes       | 10- Good         |
| Zhang et al., 2018 [2]       | Yes      | Yes      | Yes      | Yes      | No       | Yes      | Yes      | No       | Yes      | Yes       | 8- Good          |
| Baum et al., 2019 [15]       | Yes      | Yes      | Yes      | Yes      | Yes      | Yes      | No       | Yes      | Yes      | Yes       | 9- Good          |
| Gill et al., 2017 [13]       | Yes      | Yes      | Yes      | Yes      | Yes      | Yes      | No       | No       | Yes      | Yes       | 8- Good          |
| Kuo et al., 2011 [10]        | Yes      | Yes      | Yes      | Yes      | No       | Yes      | Yes      | Yes      | Yes      | Yes       | 9- Good          |
| Lopez et al., 2013 [14]      | Yes       | 10- Good         |
| Qassemeyar et al., 2014 [19] | Yes      | Yes      | Yes      | Yes      | Yes      | Yes      | No       | Yes      | Yes      | Yes       | 9- Good          |
| Cumming et al., 2019 [32]    | Yes      | Yes      | Yes      | Yes      | Yes      | No       | No       | Yes      | Yes      | Yes       | 8- Good          |
| Gerring et al., 2017 [33]    | Yes      | Yes      | Yes      | Yes      | Yes      | Yes      | No       | Yes      | Yes      | Yes       | 9- Good          |
| Catalano et al., 2001 [34]   | Yes      | Yes      | Yes      | Yes      | Yes      | Yes      | No       | Yes      | Yes      | Yes       | 9- Good          |
| Coston et al., 1981 [43]     | Yes      | Yes      | Yes      | Yes      | Yes      | Yes      | No       | Yes      | Yes      | Yes       | 9- Good          |
| Croce et al., 2008 [35]      | Yes      | Yes      | Yes      | Yes      | Yes      | Yes      | No       | Yes      | Yes      | Yes       | 9 – Good         |
| Cuesta-Gil et al., 2004 [48] | Yes      | Yes      | Yes      | Yes      | Yes      | Yes      | No       | Yes      | Yes      | Yes       | 9- Good          |
| Elkhamary et al., 2017 [36]  | Yes      | Yes      | Yes      | Yes      | Yes      | Yes      | No       | Yes      | Yes      | Yes       | 9- Good          |
| Elner et al., 1995 [46]      | Yes      | Yes      | Yes      | Yes      | Yes      | Yes      | No       | Yes      | Yes      | Yes       | 9- Good          |
| Goldberg et al., 2003 [4]    | Yes      | Yes      | Yes      | Yes      | Yes      | No       | Yes      | Yes      | Yes      | Yes       | 9- Good          |

---

|                              |     |     |     |     |     |     |     |     |     |     |          |
|------------------------------|-----|-----|-----|-----|-----|-----|-----|-----|-----|-----|----------|
| Karabekmez et al., 2014 [47] | Yes | Yes | Yes | Yes | Yes | Yes | No  | Yes | Yes | Yes | 9- Good  |
| Lee et al., 2014 [37]        | Yes | Yes | Yes | Yes | No  | Yes | No  | Yes | Yes | Yes | 8- Good  |
| Maheshwari et al., 2010 [38] | Yes | Yes | Yes | Yes | Yes | Yes | No  | No  | Yes | Yes | 8- Good  |
| Ogun et al., 2009 [39]       | Yes | Yes | Yes | Yes | No  | Yes | No  | Yes | Yes | Yes | 8- Good  |
| Torrioni et al., 2015 [40]   | Yes | Yes | Yes | Yes | Yes | Yes | No  | Yes | Yes | Yes | 9- Good  |
| Wang et al., 2021 [18]       | Yes | 10- Good |
| Esmaeli et al., 2006 [41]    | Yes | Yes | Yes | Yes | Yes | Yes | No  | Yes | Yes | Yes | 9- Good  |
| Lin et al., 2002 [44]        | Yes | Yes | Yes | Yes | No  | Yes | Yes | Yes | Yes | Yes | 9- Good  |
| Nagendran et al., 2016 [17]  | Yes | 10- Good |
| Naquin et al., 1954 [45]     | Yes | Yes | Yes | Yes | No  | Yes | No  | Yes | Yes | Yes | 8- Good  |
| Rathbun et al., 1971 [42]    | Yes | Yes | Yes | Yes | Yes | Yes | No  | Yes | Yes | Yes | 9- Good  |

**Table S2.** Overview of clinical characteristics and outcomes of included studies.

|    | Author, year                 | Level of evidence | Cohort size | Mean age $\pm$ SD | No. of males (%) | No. of SCC and BCC histopathology       | OE type (T vs. S vs. E) <sup>†</sup> | Surgical margins (P vs. N) | Patient status          |
|----|------------------------------|-------------------|-------------|-------------------|------------------|-----------------------------------------|--------------------------------------|----------------------------|-------------------------|
| 1  | Martel et al., 2020 [6]      | IV                | 25          | 63.2 $\pm$ 16.4   | 9 (36.0%)        | SCC (4)<br>BCC (2)                      | T (22)<br>S (2)                      | P (4)<br>N (21)            | Dead (10)<br>Alive (15) |
| 2  | Nemet et al., 2007 [8]       | IV                | 38          | 69.9 (NS)         | 26 (68.4%)       | SCC (15)<br>BCC (10)                    | T (26)<br>E (4)                      | P (14)<br>N (24)           | Dead (9)<br>Alive (29)  |
| 3  | Hoffman et al., 2016 [9]     | IV                | 31          | 65 $\pm$ 15       | 24 (77.0%)       | SCC (16)<br>BCC (8)                     | T (30)                               | -                          | Dead (14)<br>Alive (17) |
| 4  | Nassab et al., 2007 [23]     | IV                | 32          | 68 (NS)           | 20 (62.5%)       | SCC (3)<br>BCC (17)                     | -                                    | -                          | -                       |
| 5  | Simon et al., 2005 [3]       | IV                | 34          | 67 $\pm$ 14       | 10 (29.4%)       | SCC (9)<br>BCC (6)<br>Mixed SCC/BCC (1) | T (14)<br>S (7)<br>E (7)             | P (11)<br>N (23)           | Dead (3)<br>Alive (31)  |
| 6  | Tassone et al., 2017 [11]    | IV                | 77          | 64.1 (NS)         | 57 (74.0%)       | SCC (31)<br>BCC (15)                    | T (33)<br>S (5)<br>E (39)            | -                          | Dead (4)<br>Alive (71)  |
| 7  | Taylor et al., 2006 [12]     | IV                | 14          | 66 (NS)           | 7 (50.0%)        | SCC (2)<br>BCC (0)                      | T (10)                               | P (2)<br>N (12)            | Dead (4)<br>Alive (10)  |
| 8  | Zhang et al., 2018 [2]       | IV                | 102         | 67.5 $\pm$ 15     | 55 (54.0%)       | SCC (36)<br>BCC (17)                    | T (55)<br>E (47)                     | P (21)<br>N (81)           | Dead (29)<br>Alive (58) |
| 9  | Baum et al., 2019 [15]       | IV                | 48          | 62 $\pm$ 17       | 24 (50.0%)       | SCC (15)<br>BCC (7)                     | T (22)<br>S (26)                     | -                          | -                       |
| 10 | Gill et al., 2017 [13]       | IV                | 70          | 63.6 (NS)         | 53 (76.0%)       | SCC (19)<br>BCC (12)                    | E (70)                               | -                          | -                       |
| 11 | Kuo et al., 2011 [10]        | IV                | 38          | 68 (NS)           | 25 (65.8%)       | SCC (19)<br>BCC (12)                    | T (7)<br>E (31)                      | P (17)<br>N (21)           | Dead (4)<br>Alive (29)  |
| 12 | Lopez et al., 2013 [14]      | IV                | 21          | 58 $\pm$ 15       | 15 (71.4%)       | SCC (6)<br>BCC (3)                      | T (5)<br>E (16)                      | P (7)<br>N (14)            | Dead (15)<br>Alive (6)  |
| 13 | Qassemeyar et al., 2014 [19] | IV                | 26          | 68 (NS)           | 16 (61.5%)       | SCC (9)<br>BCC (11)                     | T (13)<br>S (1)<br>E (12)            | -                          | -                       |
| 14 | Cumming et al., 2019 [32]    | IV                | 35          | -                 | 23 (65.7%)       | SCC (15)<br>BCC (6)                     | -                                    | P (12)<br>N (23)           | -                       |
| 15 | Gerring et al., 2017 [33]    | IV                | 49          | 70.3 (NS)         | 38 (77.6%)       | SCC (17)<br>BCC (22)                    | -                                    | P (12)<br>N (37)           | -                       |
| 16 | Catalano et al., 2001 [34]   | IV                | 20          | 57.85 $\pm$ 12.8  | 8 (40.0%)        | SCC (7)<br>BCC (0)                      | -                                    | -                          | Dead (7)<br>Alive (13)  |
| 17 | Coston et al., 1981 [43]     | IV                | 11          | 61.6 $\pm$ 15.7   | 5 (45.5%)        | SCC (2)<br>BCC (1)                      | T (1)<br>S (10)                      | -                          | Dead (2)<br>Alive (9)   |
| 18 | Croce et al., 2008 [35]      | IV                | 8           | 75.2 $\pm$ 5.5    | 6 (75.0%)        | SCC (1)<br>BCC (4)                      | T (6)<br>S (2)                       | -                          | Dead (4)<br>Alive (4)   |
| 19 | Cuesta-Gil et al., 2004 [48] | IV                | 9           | 72.3 $\pm$ 9.4    | 6 (66.7%)        | SCC (3)<br>BCC (4)                      | E (9)                                | -                          | Dead (2)<br>Alive (7)   |
| 20 | Elkhamary et al., 2017 [36]  | IV                | 27          | 64.1 $\pm$ 16.3   | 17 (63.0%)       | SCC (11)<br>BCC (8)                     | T (13)<br>S (2)<br>E (5)             | -                          | -                       |
| 21 | Elner et al., 1995 [46]      | IV                | 8           | 60 $\pm$ 8.7      | 5 (62.5%)        | SCC (4)<br>BCC (0)                      | -                                    | -                          | Dead (3)<br>Alive (5)   |
| 22 | Goldberg et al., 2003 [4]    | IV                | 25          | 63.2 $\pm$ 9.9    | -                | SCC (7)<br>BCC (2)                      | T (13)<br>S (10)                     | P (7)<br>N (18)            | Dead (2)<br>Alive (NS)  |
| 23 | Karabekmez et al., 2014 [47] | IV                | 9           | 77 $\pm$ 6.3      | 2 (22.2%)        | SCC (9)<br>BCC (0)                      | -                                    | P (6)<br>N (3)             | Dead (9)<br>Alive (0)   |
| 24 | Lee et al., 2014 [37]        | IV                | 17          | 54.6 $\pm$ 16.3   | 11 (64.7%)       | SCC (6)<br>BCC (2)                      | -                                    | -                          | Dead (10)<br>Alive (6)  |
| 25 | Maheshwari et al., 2010 [38] | IV                | 15          | 53.9 $\pm$ 16.1   | 9 (60.0%)        | SCC (3)<br>BCC (3)                      | T (2)<br>S (13)                      | -                          | -                       |
| 26 | Ogun et al., 2009 [39]       | IV                | 11          | 56.5 $\pm$ 14.4   | 6 (54.5%)        | SCC (11)<br>BCC (0)                     | -                                    | -                          | -                       |
| 27 | Torroni et al., 2015 [40]    | IV                | 9           | 75.1 $\pm$ 7.7    | 2 (22.2%)        | SCC (3)<br>BCC (4)                      | T (6)<br>S (2)                       | -                          | -                       |

|    |                             |    |    |             |            |                     | E (1)           |                  |                         |
|----|-----------------------------|----|----|-------------|------------|---------------------|-----------------|------------------|-------------------------|
| 28 | Wang et al., 2021 [18]      | IV | 30 | 66.8 ± 16.3 | 10 (33.3%) | SCC (2)<br>BCC (1)  | -               | P (10)<br>N (20) | Dead (18)<br>Alive (12) |
| 29 | Esmaeli et al., 2006 [41]   | IV | 7  | 43.7 ± 6.5  | 3 (42.9%)  | SCC (0)<br>BCC (0)  | E (7)           | -                | Dead (5)<br>Alive (2)   |
| 30 | Lin et al., 2002 [44]       | IV | 7  | 56 ± 10.4   | 4 (57.1%)  | SCC (3)<br>BCC (2)  | T (6)<br>S (1)  | -                | Dead (3)<br>Alive (4)   |
| 31 | Nagendran et al., 2016 [17] | IV | 24 | 66.3 ± 18.4 | 14 (58.3%) | SCC (7)<br>BCC (3)  | T (18)<br>S (6) | P (13)<br>N (11) | Dead (17)<br>Alive (7)  |
| 32 | Naquin et al., 1954 [45]    | IV | 39 | 55.7 ± 9.4  | 25 (64.1%) | SCC (3)<br>BCC (11) | -               | -                | Dead (18)<br>Alive (19) |
| 33 | Rathbun et al., 1971 [42]   | IV | 41 | 59.6 ± 16.7 | 23 (56.1%) | SCC (6)<br>BCC (14) | -               | -                | Dead (23)<br>Alive (18) |

Data are presented as number (%) or mean ± SD. \*Might not sum up to the total cohort size as some patients' type of OE was not specified in the studies. SCC, squamous cell carcinoma; BCC, basal cell carcinoma; OE, orbital exenteration; T, total OE; S, subtotal OE; E, extended OE; P, positive surgical margin; N, negative surgical margin; NS, not specified.
